# Supplementary material for: Theoretical studies on characterization of heterofullerene C58B2 isomers by X-ray spectroscopy
Source: Royal Society of Chemistry journal article supplement (doi:10.1039/c6ra20768e), 2016-01-01
Supplement: c6ra20768e1.pdf [file c6ra20768e1.pdf]

## Supporting Information

### **Theoretical studies on characterization of heterofullerene C<sub>58</sub>B<sub>2</sub> isomers by X-ray spectroscopy**

Jiayuan Qi \*, Huanhuan Zhu, Mei Zheng, Xiaoying Hu

*College of Chemistry, Fuzhou University, Fuzhou, Fujian, 350116, People's Republic of China*

#### **Table of contents**

|                                                                                                |               |
|------------------------------------------------------------------------------------------------|---------------|
| <b>Optimized coordinates of the singlet 1,4-C<sub>58</sub>B<sub>2</sub> in gas phase.....</b>  | <b>S2-S3</b>  |
| <b>Optimized coordinates of the singlet 1,16-C<sub>58</sub>B<sub>2</sub> in gas phase.....</b> | <b>S4-S5</b>  |
| <b>Optimized coordinates of the singlet I<sub>h</sub>-C<sub>60</sub> in gas phase.....</b>     | <b>S6-S7</b>  |
| <b>The details of calculation.....</b>                                                         | <b>S8-S11</b> |

## 1. Optimized coordinates of the singlet 1,4-C<sub>58</sub>B<sub>2</sub> in gas phase:

**Table S1.** Coordinates of optimized structure of the singlet 1,4-C<sub>58</sub>B<sub>2</sub> in gas phase at the B3LYP/6-31G\*\* level.

| Atoms | Coordinates |           |           |
|-------|-------------|-----------|-----------|
|       | X           | Y         | Z         |
| C     | 1.887870    | -3.020700 | 0.000000  |
| C     | 2.404649    | -2.341398 | 1.174322  |
| C     | 1.592935    | -2.182423 | 2.300667  |
| C     | 0.237824    | -2.693662 | 2.300179  |
| C     | -0.261445   | -3.344377 | 1.170908  |
| C     | 0.579331    | -3.509911 | 0.000000  |
| C     | 2.404649    | -2.341398 | -1.174322 |
| C     | 3.241007    | -1.243401 | -0.725121 |
| C     | 3.241007    | -1.243401 | 0.725121  |
| C     | 3.239188    | -0.029889 | 1.423009  |
| C     | 1.592604    | -0.920612 | 3.025618  |
| C     | -0.603017   | -1.756195 | 3.026018  |
| C     | -1.910282   | -1.495849 | 2.603349  |
| C     | -2.449315   | -2.201886 | 1.421379  |
| C     | -1.619353   | -3.090857 | 0.725745  |
| C     | -1.619353   | -3.090857 | -0.725745 |
| C     | -0.261445   | -3.344377 | -1.170908 |
| C     | 0.237824    | -2.693662 | -2.300179 |
| C     | 1.592935    | -2.182423 | -2.300667 |
| C     | 3.239188    | -0.029889 | -1.423009 |
| C     | 2.403521    | 0.132838  | -2.595971 |
| C     | 1.592604    | -0.920612 | -3.025618 |
| C     | 0.237137    | -0.661020 | -3.466699 |
| C     | -0.603017   | -1.756195 | -3.026018 |
| C     | -1.910282   | -1.495849 | -2.603349 |
| C     | -2.449315   | -2.201886 | -1.421379 |
| C     | -3.381885   | -1.365732 | -0.695805 |
| C     | -3.381885   | -1.365732 | 0.695805  |
| C     | 0.237137    | -0.661020 | 3.466699  |
| C     | -2.422711   | 2.407630  | 1.167645  |
| C     | -1.608860   | 2.190181  | 2.278123  |
| C     | -0.248669   | 2.688712  | 2.286030  |
| C     | 0.269521    | 3.356914  | 1.170864  |
| C     | -0.560825   | 3.544211  | 0.000000  |
| C     | -2.422711   | 2.407630  | -1.167645 |
| C     | -3.355778   | 1.372596  | -0.696244 |
| C     | -3.355778   | 1.372596  | 0.696244  |

|   |           |           |           |
|---|-----------|-----------|-----------|
| C | -2.450994 | -0.152215 | 2.667579  |
| C | -1.610082 | 0.896439  | 3.024782  |
| C | 0.585590  | 1.742722  | 3.007766  |
| C | 1.891471  | 1.494210  | 2.593755  |
| C | 2.420803  | 2.173662  | 1.421869  |
| C | 1.627216  | 3.086190  | 0.726993  |
| C | 1.627216  | 3.086190  | -0.726993 |
| C | 0.269521  | 3.356914  | -1.170864 |
| C | -0.248669 | 2.688712  | -2.286030 |
| C | -1.608860 | 2.190181  | -2.278123 |
| C | -2.450994 | -0.152215 | -2.667579 |
| C | -1.610082 | 0.896439  | -3.024782 |
| C | -0.258304 | 0.649177  | -3.455798 |
| C | 0.585590  | 1.742722  | -3.007766 |
| C | 1.891471  | 1.494210  | -2.593755 |
| C | 2.420803  | 2.173662  | -1.421869 |
| C | 3.253241  | 1.229121  | -0.697946 |
| C | 3.253241  | 1.229121  | 0.697946  |
| C | -0.258304 | 0.649177  | 3.455798  |
| C | 2.403521  | 0.132838  | 2.595971  |
| C | -1.876184 | 3.077485  | 0.000000  |
| B | -3.397332 | 0.016295  | -1.449504 |
| B | -3.397332 | 0.016295  | 1.449504  |

---

## 2. Optimized coordinates of the singlet 1,16-C<sub>58</sub>B<sub>2</sub> in gas phase:

**Table S2.** Coordinates of optimized structure of the singlet 1,16-C<sub>58</sub>B<sub>2</sub> in gas phase at the B3LYP/6-31G\*\* level.

| Atoms | Coordinates |           |           |
|-------|-------------|-----------|-----------|
|       | X           | Y         | Z         |
| C     | -1.115012   | 2.268758  | 2.661028  |
| C     | -1.826297   | -0.254662 | 3.130420  |
| C     | -0.506954   | -0.532558 | 3.486924  |
| C     | 0.506954    | 0.532558  | 3.486924  |
| C     | 0.171610    | 1.916306  | 3.030676  |
| C     | -1.324646   | 3.021636  | 1.438478  |
| C     | -2.486815   | 2.476352  | 0.703895  |
| C     | -3.064509   | 1.358104  | 1.434368  |
| C     | -3.460531   | 0.223892  | 0.731977  |
| C     | -2.338075   | -1.380117 | 2.330258  |
| C     | -0.171610   | -1.916306 | 3.030676  |
| C     | 1.115012    | -2.268758 | 2.661028  |
| C     | 1.826297    | 0.254662  | 3.130420  |
| C     | 2.338075    | 1.380117  | 2.330258  |
| C     | 1.318657    | 2.410023  | 2.304407  |
| C     | 1.119771    | 3.197483  | 1.168124  |
| C     | -0.225354   | 3.503419  | 0.717749  |
| C     | -2.466278   | 2.468947  | -0.694066 |
| C     | -1.318657   | 2.980602  | -1.427230 |
| C     | -0.220008   | 3.486832  | -0.735837 |
| C     | 1.126025    | 3.170010  | -1.179843 |
| C     | 1.951767    | 2.984776  | -0.000308 |
| C     | 2.922811    | 1.977084  | 0.019759  |
| C     | 3.120355    | 1.153483  | 1.202301  |
| C     | 3.460531    | -0.223892 | 0.731977  |
| C     | 3.064509    | -1.358104 | 1.434368  |
| C     | -1.318657   | -2.410023 | 2.304407  |
| C     | 1.318657    | -2.980602 | -1.427230 |
| C     | 0.220008    | -3.486832 | -0.735837 |
| C     | -1.126025   | -3.170010 | -1.179843 |
| C     | -1.317433   | -2.365795 | -2.306155 |
| C     | -0.173140   | -1.844597 | -3.031468 |
| C     | 2.138697    | -1.112248 | -2.585686 |
| C     | 2.965018    | -1.311523 | -1.411862 |
| C     | 2.466278    | -2.468947 | -0.694066 |
| C     | 2.486815    | -2.476352 | 0.703895  |
| C     | 1.324646    | -3.021636 | 1.438478  |

|   |           |           |           |
|---|-----------|-----------|-----------|
| C | 0.225354  | -3.503419 | 0.717749  |
| C | -1.951767 | -2.984776 | -0.000308 |
| C | -2.922811 | -1.977084 | 0.019759  |
| C | -3.115836 | -1.145896 | -1.151634 |
| C | -2.341362 | -1.337832 | -2.294517 |
| C | -1.832344 | -0.183445 | -3.019406 |
| C | -0.494573 | -0.497361 | -3.469844 |
| C | 0.494573  | 0.497361  | -3.469844 |
| C | 1.832344  | 0.183445  | -3.019406 |
| C | 3.441968  | -0.201067 | -0.705622 |
| C | 3.115836  | 1.145896  | -1.151634 |
| C | 2.341362  | 1.337832  | -2.294517 |
| C | 1.317433  | 2.365795  | -2.306155 |
| C | 0.173140  | 1.844597  | -3.031468 |
| C | -1.119771 | 2.145746  | -2.598405 |
| C | -2.138697 | 1.112248  | -2.585686 |
| C | -2.965018 | 1.311523  | -1.411862 |
| C | -3.441968 | 0.201067  | -0.705622 |
| C | -1.119771 | -3.197483 | 1.168124  |
| C | -3.120355 | -1.153483 | 1.202301  |
| C | 1.119771  | -2.145746 | -2.598405 |
| B | -2.206932 | 1.165979  | 2.701820  |
| B | 2.206932  | -1.165979 | 2.701820  |

---

### 3. Optimized coordinates of the singlet $I_h$ -C<sub>60</sub> in gas phase:

**Table S3.** Coordinates of optimized structure of the singlet  $I_h$ -C<sub>60</sub> in gas phase at the B3LYP/6-31G\*\* level.

| Atoms | Coordinates |           |           |
|-------|-------------|-----------|-----------|
|       | X           | Y         | Z         |
| C     | 0.726688    | -1.000200 | 3.327513  |
| C     | -0.726688   | -1.000200 | 3.327513  |
| C     | -1.424393   | -1.960508 | 2.593903  |
| C     | -0.697705   | -2.960708 | 1.829818  |
| C     | 0.697705    | -2.960708 | 1.829818  |
| C     | 1.424393    | -1.960508 | 2.593903  |
| C     | 1.175806    | 0.382042  | 3.327513  |
| C     | 0.000000    | 1.236315  | 3.327513  |
| C     | -1.175806   | 0.382042  | 3.327513  |
| C     | -2.304716   | 0.748848  | 2.593903  |
| C     | -2.600198   | -1.578466 | 1.829818  |
| C     | -1.424393   | -3.196823 | 0.593503  |
| C     | -0.726688   | -3.423522 | -0.593503 |
| C     | 0.726688    | -3.423522 | -0.593503 |
| C     | 1.424393    | -3.196823 | 0.593503  |
| C     | 2.600198    | -2.342551 | 0.593503  |
| C     | 2.600198    | -1.578466 | 1.829818  |
| C     | 3.031404    | -0.251352 | 1.829818  |
| C     | 2.304716    | 0.748848  | 2.593903  |
| C     | 0.000000    | 2.423322  | 2.593903  |
| C     | 1.175806    | 2.805364  | 1.829818  |
| C     | 2.304716    | 1.985163  | 1.829818  |
| C     | 3.031404    | 1.749047  | 0.593503  |
| C     | 3.480521    | 0.366805  | 0.593503  |
| C     | 3.480521    | -0.366805 | -0.593503 |
| C     | 3.031404    | -1.749047 | -0.593503 |
| C     | 2.304716    | -1.985163 | -1.829818 |
| C     | 1.175806    | -2.805364 | -1.829818 |
| C     | -2.600198   | -2.342551 | 0.593503  |
| C     | -1.175806   | -0.382042 | -3.327513 |
| C     | -2.304716   | -0.748848 | -2.593903 |
| C     | -3.031404   | 0.251352  | -1.829818 |
| C     | -2.600198   | 1.578466  | -1.829818 |
| C     | -1.424393   | 1.960508  | -2.593903 |
| C     | 0.726688    | 1.000200  | -3.327513 |
| C     | 1.175806    | -0.382042 | -3.327513 |
| C     | 0.000000    | -1.236315 | -3.327513 |

|   |           |           |           |
|---|-----------|-----------|-----------|
| C | 0.000000  | -2.423322 | -2.593903 |
| C | -1.175806 | -2.805364 | -1.829818 |
| C | -2.304716 | -1.985163 | -1.829818 |
| C | -3.480521 | -0.366805 | -0.593503 |
| C | -3.480521 | 0.366805  | 0.593503  |
| C | -3.031404 | 1.749047  | 0.593503  |
| C | -2.600198 | 2.342551  | -0.593503 |
| C | -1.424393 | 3.196823  | -0.593503 |
| C | -0.697705 | 2.960708  | -1.829818 |
| C | 0.697705  | 2.960708  | -1.829818 |
| C | 1.424393  | 1.960508  | -2.593903 |
| C | 2.304716  | -0.748848 | -2.593903 |
| C | 3.031404  | 0.251352  | -1.829818 |
| C | 2.600198  | 1.578466  | -1.829818 |
| C | 2.600198  | 2.342551  | -0.593503 |
| C | 1.424393  | 3.196823  | -0.593503 |
| C | 0.726688  | 3.423522  | 0.593503  |
| C | -0.726688 | 3.423522  | 0.593503  |
| C | -1.175806 | 2.805364  | 1.829818  |
| C | -2.304716 | 1.985163  | 1.829818  |
| C | -3.031404 | -1.749047 | -0.593503 |
| C | -3.031404 | -0.251352 | 1.829818  |
| C | -0.726688 | 1.000200  | -3.327513 |

---

#### 4. The details of calculations:

**Table S4.** Statistics over bond lengths (Å) of  $I_h$ -C<sub>60</sub>, 1,4-C<sub>58</sub>B<sub>2</sub> and 1,16-C<sub>58</sub>B<sub>2</sub>.

| $I_h$ -C <sub>60</sub> |        | 1,4-C <sub>58</sub> B <sub>2</sub> |        | 1,16-C <sub>58</sub> B <sub>2</sub> |        |
|------------------------|--------|------------------------------------|--------|-------------------------------------|--------|
| R(1,2)                 | 1.4534 | R(1,2)                             | 1.4517 | R(1,5)                              | 1.3843 |
| R(1,6)                 | 1.3951 | R(1,6)                             | 1.3970 | R(1,6)                              | 1.4510 |
| R(1,7)                 | 1.4534 | R(1,7)                             | 1.4517 | R(1,59)                             | 1.5524 |
| R(2,3)                 | 1.3951 | R(2,3)                             | 1.3974 | R(2,3)                              | 1.3946 |
| R(2,9)                 | 1.4534 | R(2,9)                             | 1.4515 | R(2,10)                             | 1.4727 |
| R(3,4)                 | 1.4534 | R(3,4)                             | 1.4483 | R(2,59)                             | 1.5319 |
| R(3,11)                | 1.4534 | R(3,11)                            | 1.4552 | R(3,4)                              | 1.4705 |
| R(4,5)                 | 1.3951 | R(4,5)                             | 1.3957 | R(3,11)                             | 1.4951 |
| R(4,12)                | 1.4534 | R(4,12)                            | 1.4535 | R(4,5)                              | 1.4951 |
| R(5,6)                 | 1.4534 | R(5,6)                             | 1.4510 | R(4,13)                             | 1.3946 |
| R(5,15)                | 1.4534 | R(5,15)                            | 1.4513 | R(5,15)                             | 1.4446 |
| R(6,17)                | 1.4534 | R(6,17)                            | 1.4510 | R(6,7)                              | 1.4790 |
| R(7,8)                 | 1.4534 | R(7,8)                             | 1.4515 | R(6,17)                             | 1.4000 |
| R(7,19)                | 1.3951 | R(7,19)                            | 1.3974 | R(7,8)                              | 1.4553 |
| R(8,9)                 | 1.4534 | R(8,9)                             | 1.4502 | R(7,18)                             | 1.3981 |
| R(8,20)                | 1.3951 | R(8,20)                            | 1.3999 | R(8,9)                              | 1.3916 |
| R(9,10)                | 1.3951 | R(9,10)                            | 1.3999 | R(8,59)                             | 1.5423 |
| R(10,57)               | 1.4534 | R(10,55)                           | 1.4529 | R(9,55)                             | 1.4379 |
| R(10,59)               | 1.4534 | R(10,57)                           | 1.4494 | R(9,57)                             | 1.4947 |
| R(11,29)               | 1.4534 | R(11,29)                           | 1.4489 | R(10,27)                            | 1.4493 |
| R(11,59)               | 1.3951 | R(11,57)                           | 1.3971 | R(10,57)                            | 1.3913 |
| R(12,13)               | 1.3951 | R(12,13)                           | 1.3983 | R(11,12)                            | 1.3843 |
| R(12,29)               | 1.4534 | R(12,29)                           | 1.4490 | R(11,27)                            | 1.4446 |
| R(13,14)               | 1.4534 | R(13,14)                           | 1.4785 | R(12,37)                            | 1.4510 |
| R(13,39)               | 1.4534 | R(13,38)                           | 1.4498 | R(12,60)                            | 1.5524 |
| R(14,15)               | 1.3951 | R(14,15)                           | 1.4011 | R(13,14)                            | 1.4727 |
| R(14,28)               | 1.4534 | R(14,28)                           | 1.4475 | R(13,60)                            | 1.5319 |
| R(15,16)               | 1.4534 | R(15,16)                           | 1.4515 | R(14,15)                            | 1.4493 |
| R(16,17)               | 1.4534 | R(16,17)                           | 1.4513 | R(14,24)                            | 1.3913 |
| R(16,26)               | 1.3951 | R(16,26)                           | 1.4011 | R(15,16)                            | 1.3967 |
| R(17,18)               | 1.3951 | R(17,18)                           | 1.3957 | R(16,17)                            | 1.4511 |
| R(18,19)               | 1.4534 | R(18,19)                           | 1.4483 | R(16,22)                            | 1.4501 |
| R(18,24)               | 1.4534 | R(18,24)                           | 1.4535 | R(17,20)                            | 1.4537 |
| R(19,22)               | 1.4534 | R(19,22)                           | 1.4552 | R(18,19)                            | 1.4548 |
| R(20,21)               | 1.4534 | R(20,21)                           | 1.4494 | R(18,54)                            | 1.4504 |
| R(20,56)               | 1.4534 | R(20,54)                           | 1.4529 | R(19,20)                            | 1.3933 |
| R(21,22)               | 1.3951 | R(21,22)                           | 1.3971 | R(19,52)                            | 1.4520 |
| R(21,54)               | 1.4534 | R(21,52)                           | 1.4545 | R(20,21)                            | 1.4524 |



|          |        |          |        |          |        |
|----------|--------|----------|--------|----------|--------|
| R(22,23) | 1.4534 | R(22,23) | 1.4489 | R(21,22) | 1.4517 |
| R(23,24) | 1.4534 | R(23,24) | 1.4490 | R(21,50) | 1.3971 |
| R(23,52) | 1.3951 | R(23,50) | 1.4008 | R(22,23) | 1.3996 |
| R(24,25) | 1.3951 | R(24,25) | 1.3983 | R(23,24) | 1.4546 |
| R(25,26) | 1.4534 | R(25,26) | 1.4785 | R(23,48) | 1.4492 |
| R(25,50) | 1.4534 | R(25,48) | 1.4498 | R(24,25) | 1.4947 |
| R(26,27) | 1.4534 | R(26,27) | 1.4475 | R(25,26) | 1.3916 |
| R(27,28) | 1.3951 | R(27,28) | 1.3916 | R(25,47) | 1.4379 |
| R(27,49) | 1.4534 | R(27,59) | 1.5743 | R(26,36) | 1.4553 |
| R(28,38) | 1.4534 | R(28,60) | 1.5743 | R(26,60) | 1.5423 |
| R(29,58) | 1.3951 | R(29,56) | 1.4008 | R(27,56) | 1.3967 |
| R(30,31) | 1.3951 | R(30,31) | 1.3938 | R(28,29) | 1.3933 |
| R(30,37) | 1.4534 | R(30,37) | 1.4711 | R(28,35) | 1.4548 |
| R(30,60) | 1.4534 | R(30,58) | 1.4529 | R(28,58) | 1.4520 |
| R(31,32) | 1.4534 | R(31,32) | 1.4487 | R(29,30) | 1.4524 |
| R(31,40) | 1.4534 | R(31,39) | 1.4937 | R(29,38) | 1.4537 |
| R(32,33) | 1.3951 | R(32,33) | 1.3995 | R(30,31) | 1.3971 |
| R(32,41) | 1.4534 | R(32,40) | 1.4532 | R(30,39) | 1.4517 |
| R(33,34) | 1.4534 | R(33,34) | 1.4476 | R(31,32) | 1.4516 |
| R(33,44) | 1.4534 | R(33,43) | 1.4538 | R(31,42) | 1.4510 |
| R(34,46) | 1.4534 | R(34,45) | 1.4476 | R(32,44) | 1.4528 |
| R(34,60) | 1.3951 | R(34,58) | 1.3957 | R(32,58) | 1.3964 |
| R(35,36) | 1.4534 | R(35,36) | 1.4711 | R(33,34) | 1.4493 |
| R(35,48) | 1.3951 | R(35,47) | 1.3938 | R(33,46) | 1.4003 |
| R(35,60) | 1.4534 | R(35,58) | 1.4529 | R(33,58) | 1.4514 |
| R(36,37) | 1.4534 | R(36,37) | 1.3925 | R(34,35) | 1.4504 |
| R(36,49) | 1.3951 | R(36,59) | 1.5520 | R(34,47) | 1.3998 |
| R(37,38) | 1.3951 | R(37,60) | 1.5520 | R(35,36) | 1.3981 |
| R(38,39) | 1.4534 | R(38,39) | 1.3908 | R(36,37) | 1.4790 |
| R(39,40) | 1.3951 | R(38,60) | 1.5517 | R(37,38) | 1.4000 |
| R(40,58) | 1.4534 | R(39,56) | 1.4402 | R(38,56) | 1.4511 |
| R(41,42) | 1.3951 | R(40,41) | 1.3923 | R(39,40) | 1.3996 |
| R(41,58) | 1.4534 | R(40,56) | 1.4521 | R(39,56) | 1.4501 |
| R(42,43) | 1.4534 | R(41,42) | 1.4544 | R(40,41) | 1.4492 |
| R(42,59) | 1.4534 | R(41,57) | 1.4545 | R(40,57) | 1.4546 |
| R(43,44) | 1.3951 | R(42,43) | 1.3948 | R(41,42) | 1.3939 |
| R(43,57) | 1.4534 | R(42,55) | 1.4523 | R(41,55) | 1.4559 |
| R(44,45) | 1.4534 | R(43,44) | 1.4540 | R(42,43) | 1.4551 |
| R(45,46) | 1.4534 | R(44,45) | 1.4538 | R(43,44) | 1.4461 |
| R(45,55) | 1.3951 | R(44,53) | 1.3948 | R(43,53) | 1.4003 |
| R(46,47) | 1.3951 | R(45,46) | 1.3995 | R(44,45) | 1.4028 |
| R(47,48) | 1.4534 | R(46,47) | 1.4487 | R(45,46) | 1.4461 |

|          |        |          |        |          |        |
|----------|--------|----------|--------|----------|--------|
| R(47,53) | 1.4534 | R(46,51) | 1.4532 | R(45,51) | 1.4528 |
| R(48,51) | 1.4534 | R(47,49) | 1.4937 | R(46,49) | 1.4551 |
| R(49,50) | 1.4534 | R(48,49) | 1.3908 | R(47,48) | 1.4559 |
| R(50,51) | 1.3951 | R(48,59) | 1.5517 | R(48,49) | 1.3939 |
| R(51,52) | 1.4534 | R(49,50) | 1.4402 | R(49,50) | 1.4510 |
| R(52,53) | 1.4534 | R(50,51) | 1.4521 | R(50,51) | 1.4516 |
| R(53,54) | 1.3951 | R(51,52) | 1.3923 | R(51,52) | 1.3964 |
| R(54,55) | 1.4534 | R(52,53) | 1.4544 | R(52,53) | 1.4514 |
| R(55,56) | 1.4534 | R(53,54) | 1.4523 | R(53,54) | 1.4493 |
| R(56,57) | 1.3951 | R(54,55) | 1.3959 | R(54,55) | 1.3998 |

**Table S5.** Total energies (a.u.) and the relative energies (kcal/mol) at the B97D/6-311++G\*\*// B97D/6-31G\*\* level of all the 23 isomers of C<sub>58</sub>B<sub>2</sub> (atom numbering according to IUPAC rules) in the singlet and triplet states.

| Labels | Isomers                             | Singlet            |            | Triplet            |            |
|--------|-------------------------------------|--------------------|------------|--------------------|------------|
|        |                                     | $E_{\text{total}}$ | $\Delta E$ | $E_{\text{total}}$ | $\Delta E$ |
| a      | 1,4-C <sub>58</sub> B <sub>2</sub>  | -2258.01809443     | 0.00       | -2257.55783792     | 37.96      |
| b      | 1,16-C <sub>58</sub> B <sub>2</sub> | -2258.00528363     | 8.04       | -2257.55560442     | 39.36      |
| c      | 1,35-C <sub>58</sub> B <sub>2</sub> | -2258.00263668     | 9.70       | -2257.55566287     | 39.32      |
| d      | 1,53-C <sub>58</sub> B <sub>2</sub> | -2258.00148865     | 10.42      | -2257.55488932     | 39.81      |
| e      | 1,55-C <sub>58</sub> B <sub>2</sub> | -2257.99988930     | 11.42      | -2257.55557389     | 39.38      |
| f      | 1,7-C <sub>58</sub> B <sub>2</sub>  | -2257.99965757     | 11.57      | -2257.55844797     | 37.58      |
| g      | 1,60-C <sub>58</sub> B <sub>2</sub> | -2257.99871501     | 12.16      | -2257.55394063     | 40.40      |
| h      | 1,18-C <sub>58</sub> B <sub>2</sub> | -2257.99720116     | 13.11      | -2257.55533707     | 39.53      |
| i      | 1,38-C <sub>58</sub> B <sub>2</sub> | -2257.99608165     | 13.81      | -2257.55578442     | 39.25      |
| j      | 1,51-C <sub>58</sub> B <sub>2</sub> | -2257.99492185     | 14.54      | -2257.55806213     | 37.82      |
| k      | 1,52-C <sub>58</sub> B <sub>2</sub> | -2257.99475931     | 14.64      | -2257.55776825     | 38.00      |
| l      | 1,19-C <sub>58</sub> B <sub>2</sub> | -2257.99389989     | 15.18      | -2257.55074167     | 42.41      |
| m      | 1,34-C <sub>58</sub> B <sub>2</sub> | -2257.99377412     | 15.26      | -2257.55776096     | 38.01      |
| n      | 1,49-C <sub>58</sub> B <sub>2</sub> | -2257.99219152     | 16.25      | -2257.55781691     | 37.97      |
| o      | 1,13-C <sub>58</sub> B <sub>2</sub> | -2257.99217563     | 16.26      | -2257.55442661     | 40.10      |
| p      | 1,33-C <sub>58</sub> B <sub>2</sub> | -2257.99215166     | 16.28      | -2257.55793427     | 37.90      |
| q      | 1,3-C <sub>58</sub> B <sub>2</sub>  | -2257.99209873     | 16.31      | -2257.55749837     | 38.17      |
| r      | 1,31-C <sub>58</sub> B <sub>2</sub> | -2257.99209022     | 16.32      | -2257.55737573     | 38.25      |
| s      | 1,15-C <sub>58</sub> B <sub>2</sub> | -2257.99182427     | 16.48      | -2257.55560472     | 39.36      |
| t      | 1,2-C <sub>58</sub> B <sub>2</sub>  | -2257.99072047     | 17.18      | -2257.61832830     | 0.00       |
| u      | 1,17-C <sub>58</sub> B <sub>2</sub> | -2257.99039897     | 17.38      | -2257.55654080     | 38.77      |
| v      | 1,39-C <sub>58</sub> B <sub>2</sub> | -2257.98927996     | 18.08      | -2257.55648398     | 38.81      |
| w      | 1,6-C <sub>58</sub> B <sub>2</sub>  | -2257.97949937     | 24.22      | -2257.53412951     | 52.84      |

The two  $C_{58}B_2$  isomers and the corresponding pure carbon counterpart  $I_h-C_{60}$  have been optimized at the B3LYP/6-31G\*\* level by using the Gaussian 09 program, with eight-cores CPU (Intel Xeon X5450, 3.0GHz) and 6000MB memory. Then, the single point calculations with 6-311++G\*\* basis set were employed. The total CPU times are listed in Table S6. The potential pitfall of the optimization process is that the hybrid density functional method (B3LYP) has problems with describing the weak interaction. But according to our calculations, the slight effects on the systems of the present work can be safely neglected.

**Table S6.** The total CPU times (hour) for the optimization and single point calculations of the two  $C_{58}B_2$  isomers and the corresponding pure carbon counterpart  $I_h-C_{60}$ .

| Molecule          | CPU time (h) |
|-------------------|--------------|
| 1,4- $C_{58}B_2$  | 111.4        |
| 1,16- $C_{58}B_2$ | 112.4        |
| $I_h-C_{60}$      | 1.8          |
